# Supplementary material for: Anion-Exchange-Mediated Internal Electric Field: Boosting Photogenerated Carrier Separation and Utilization
Source: Research Square preprint supplement (doi:10.21203/rs.3.rs-88537/v1), 2020-10-15
Supplement: Supplementary file 1 [file 2ec21e7f8757bad22478b6eb.docx]

**Supporting Information**

**Anion-Exchange-Mediated Internal Electric Field: Boosting Photogenerated Carrier Separation and Utilization**

Tong Han1#, Xing Cao1#, Kaian Sun1#, Qing Peng1*, Weng-Chon Cheong2, Zheng Chen 3, Rui Lin4, Di Zhao5, Zewen Zhuang1, Chen Chen1, Dingsheng Wang1, and Yadong Li1*


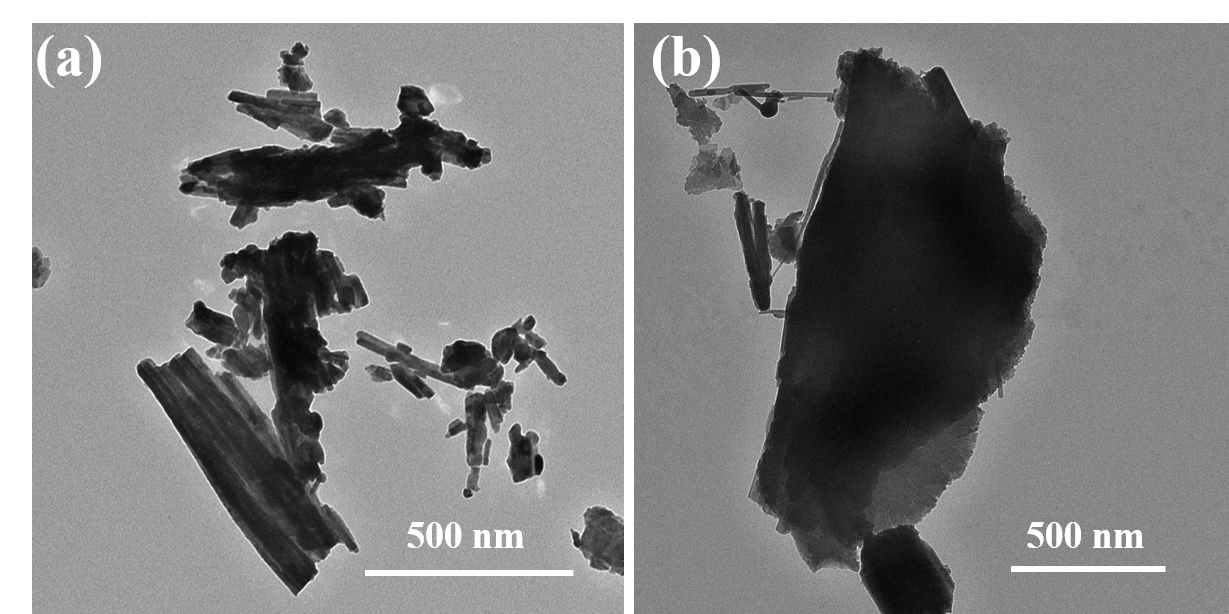


**Figure S1.** (a) TEM image of the hydrothermal product without mannitol; (b) TEM image of the hydrothermal product without PVP.


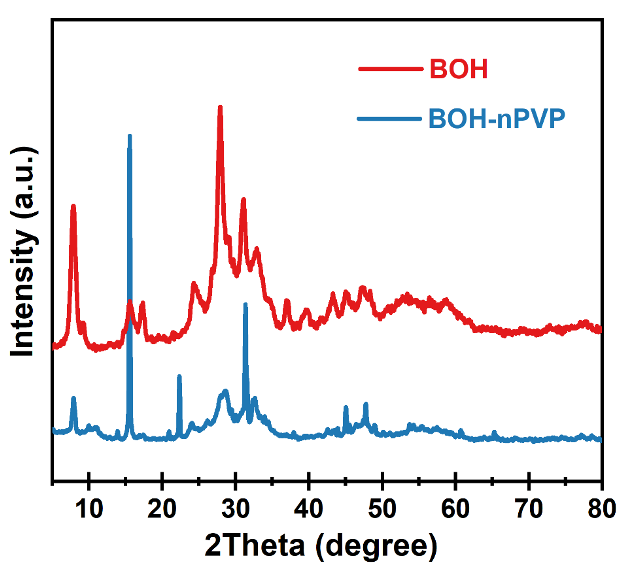


**Figure S2.** The XRD patterns of the BOH and BOH-nPVP.


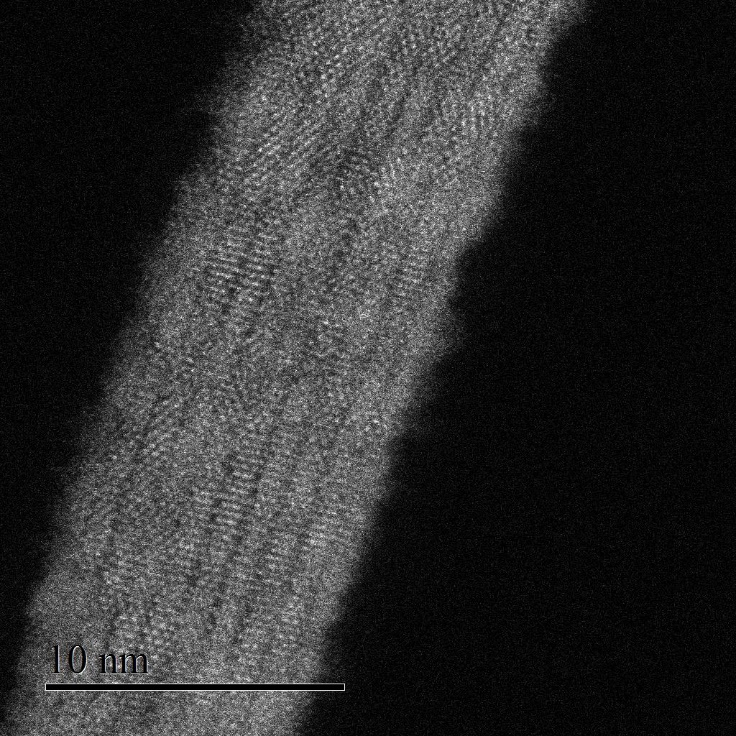


**Figure S3.** Atomic-resolution HAADF-STEM image of BOH.


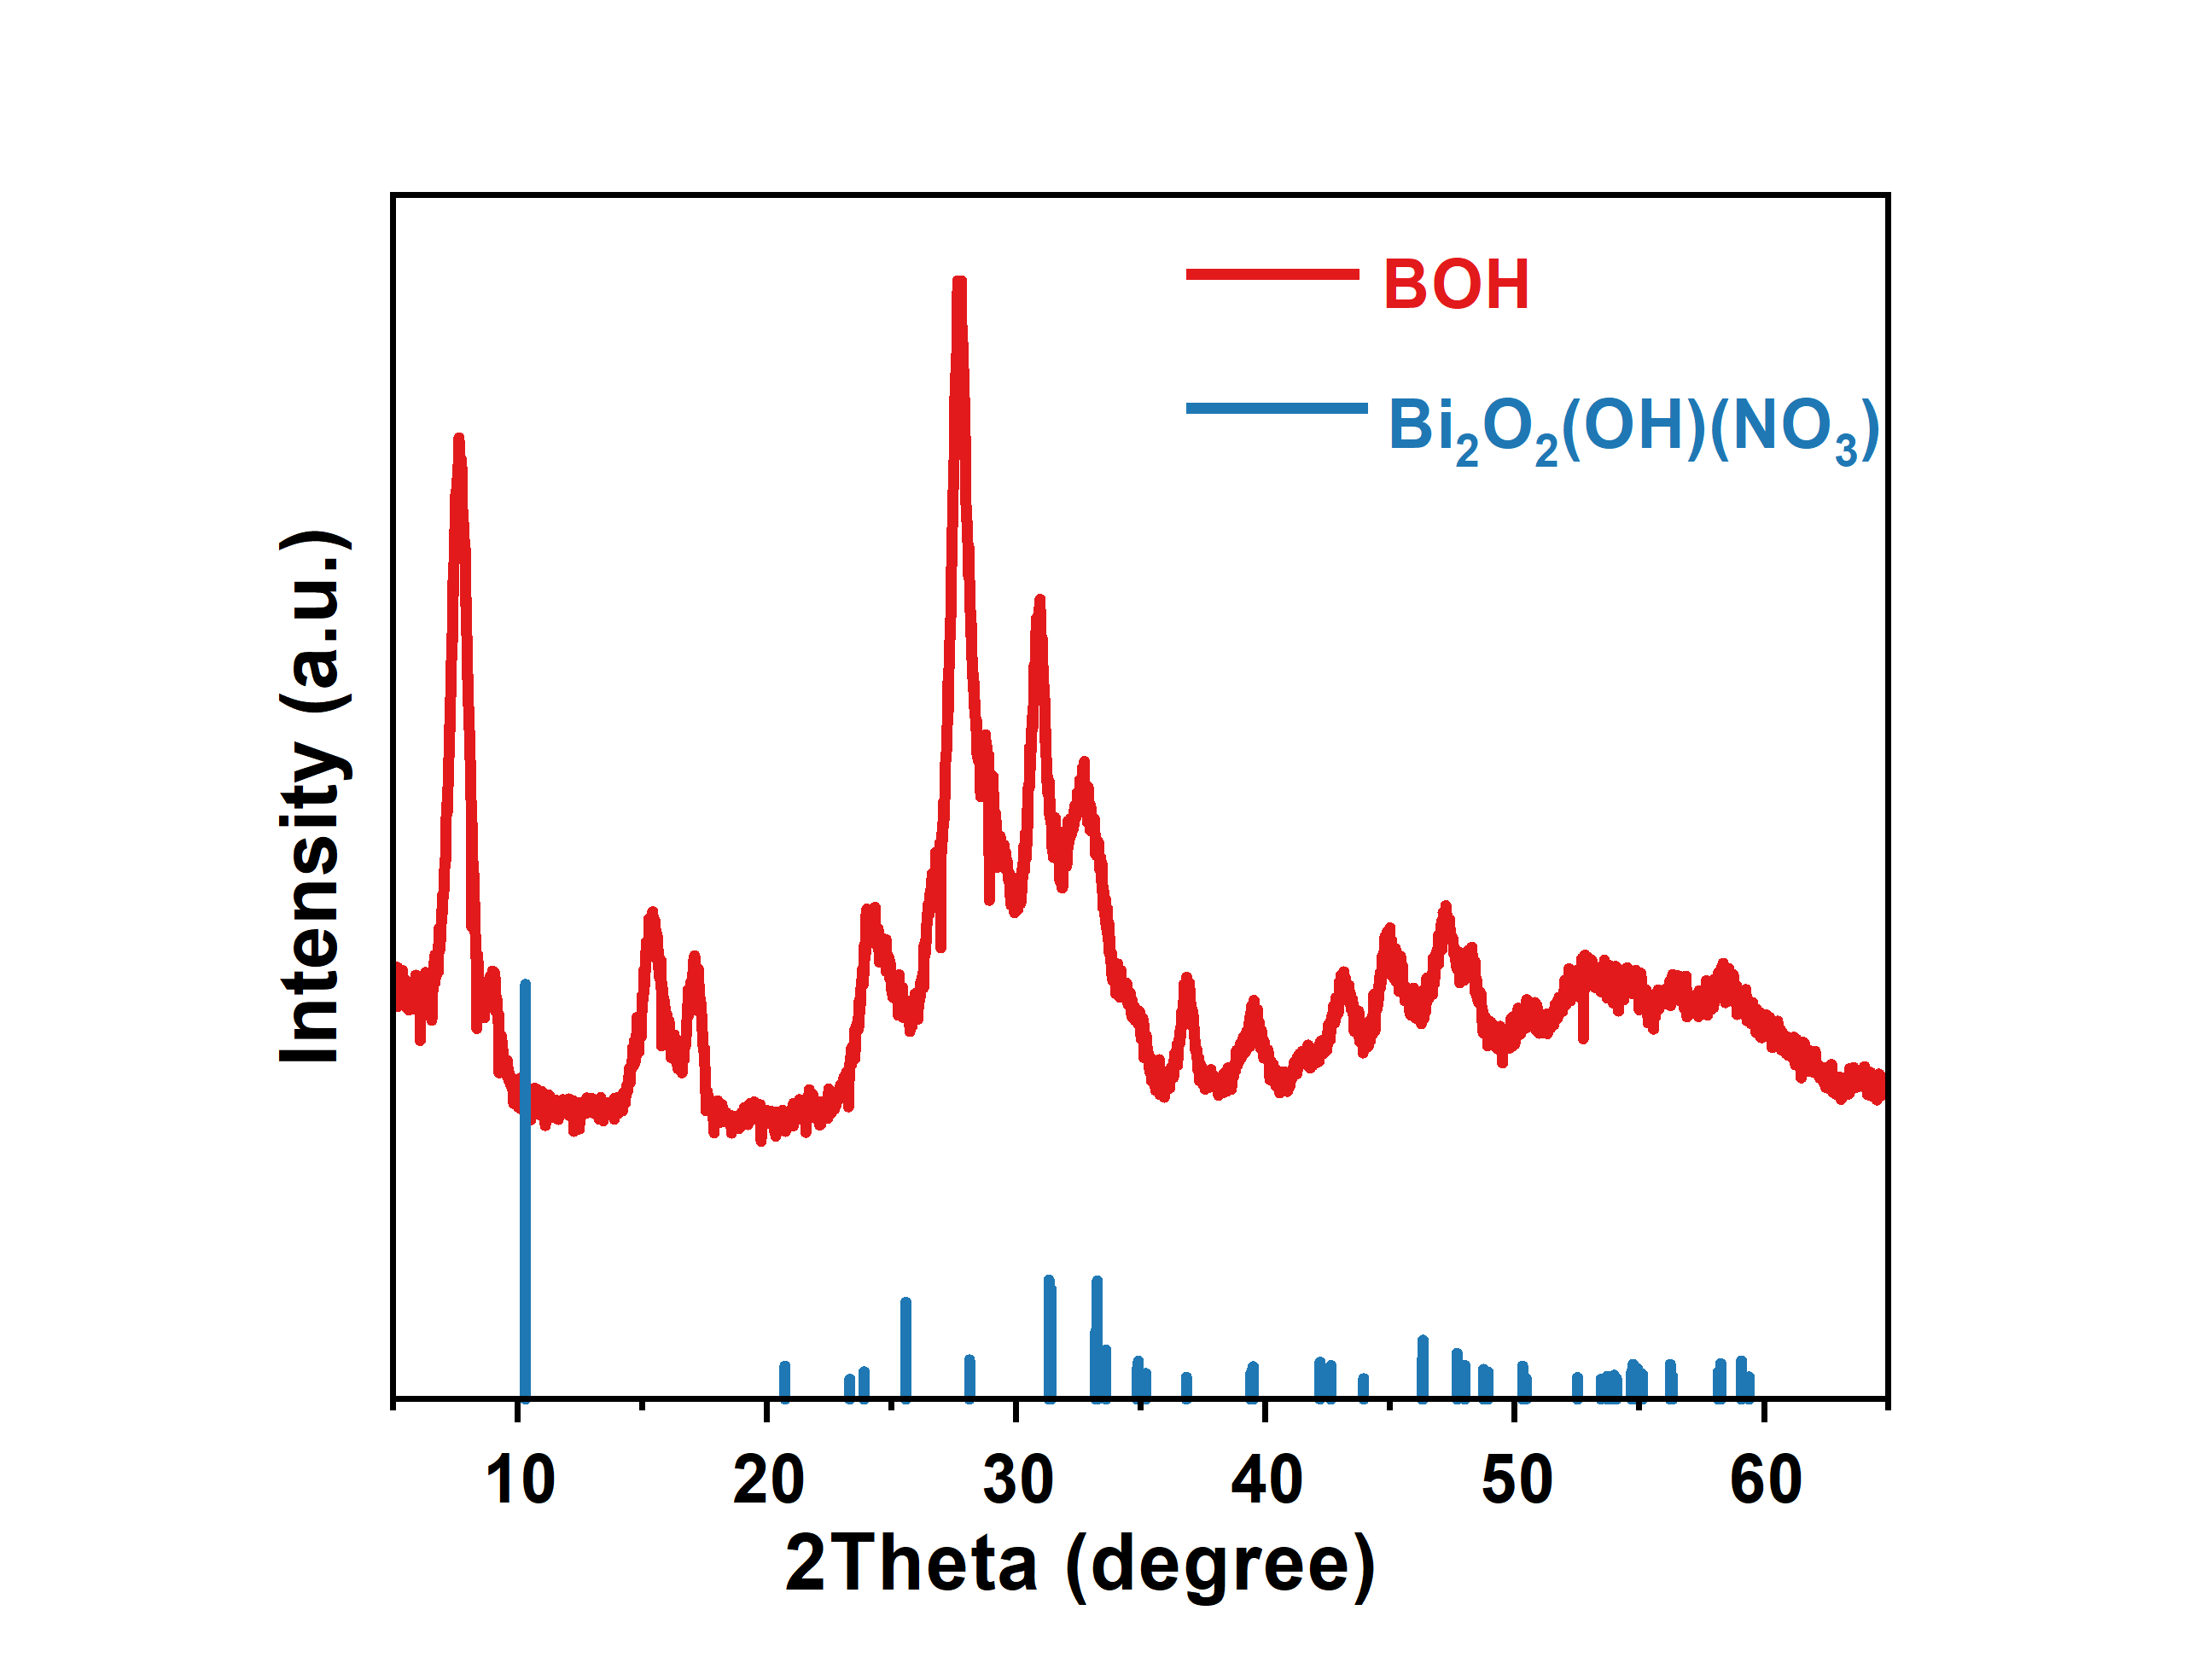


**Figure S4.** The XRD patterns of the BOH and Bi2O2(OH)(NO3).


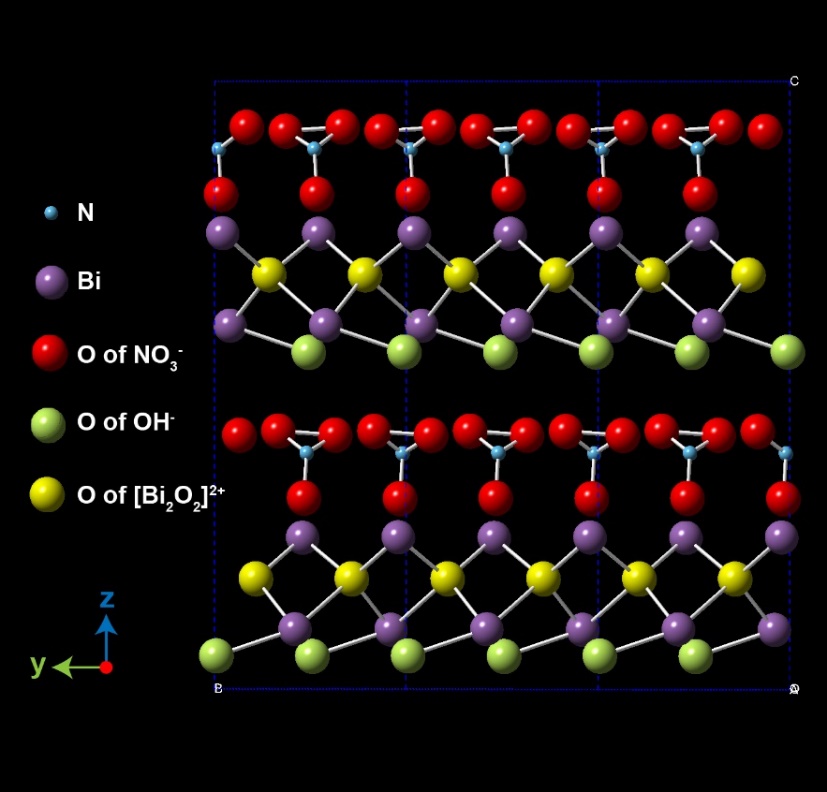


**Figure S5.** Two-dimensional model structure of Bi2O2(OH)(NO3), viewed down the x-axis.


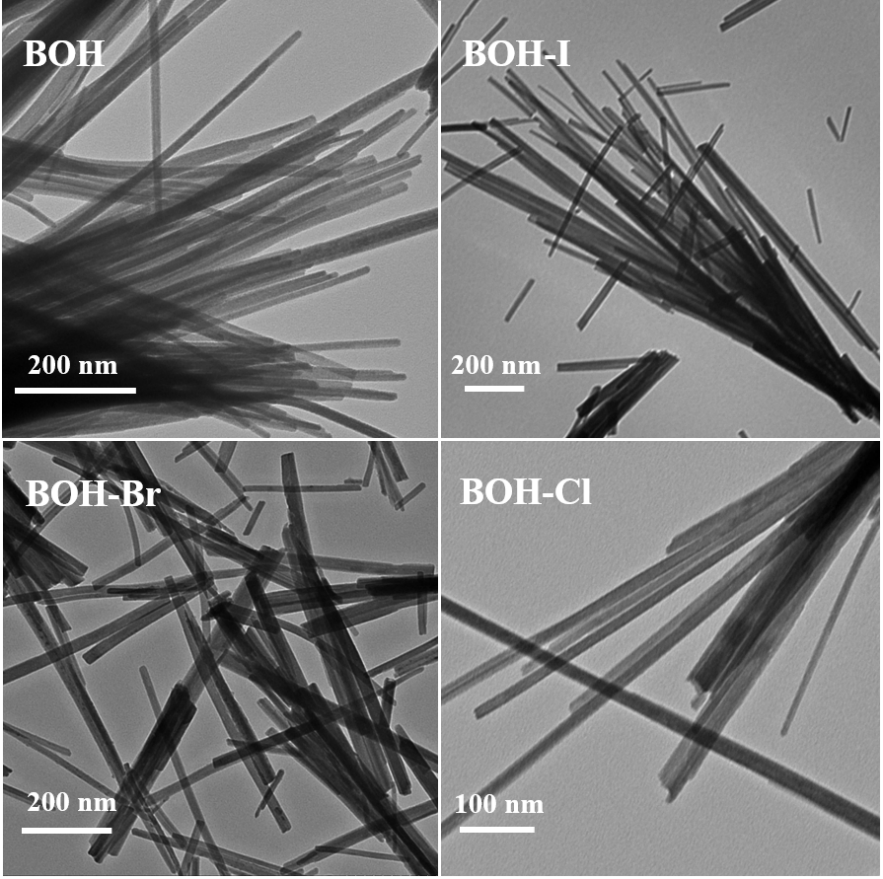


**Figure S6.** TEM images of BOH samples before and after halide-anion exchange.


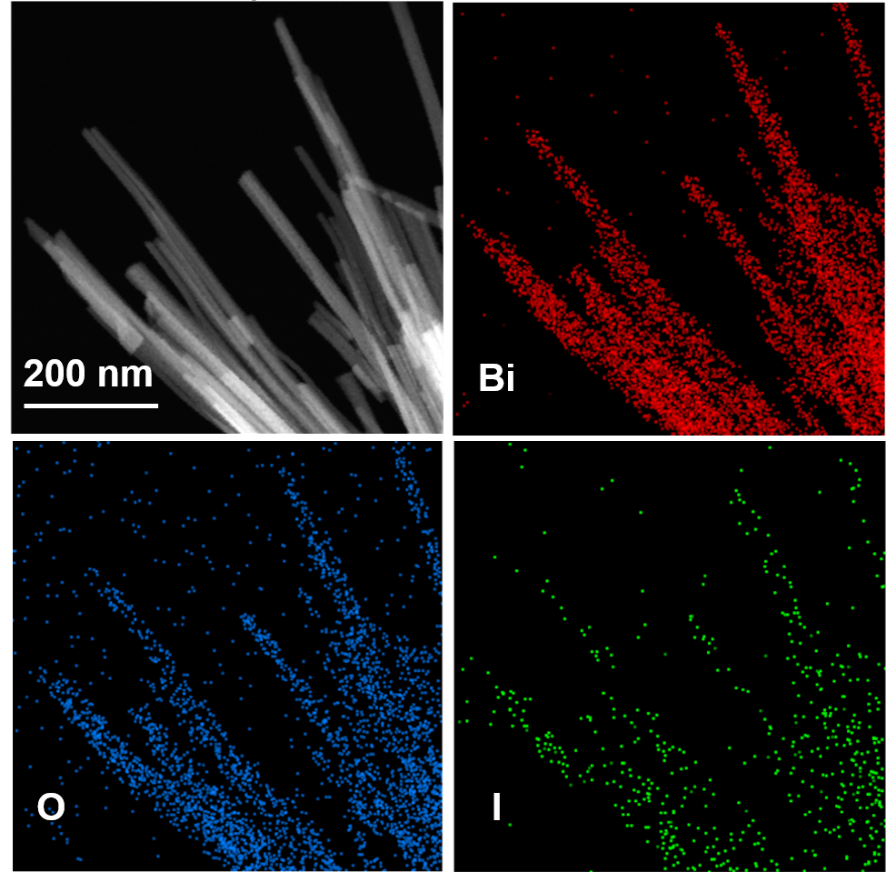


**Figure S7.** The EDS mapping of BOH-I.


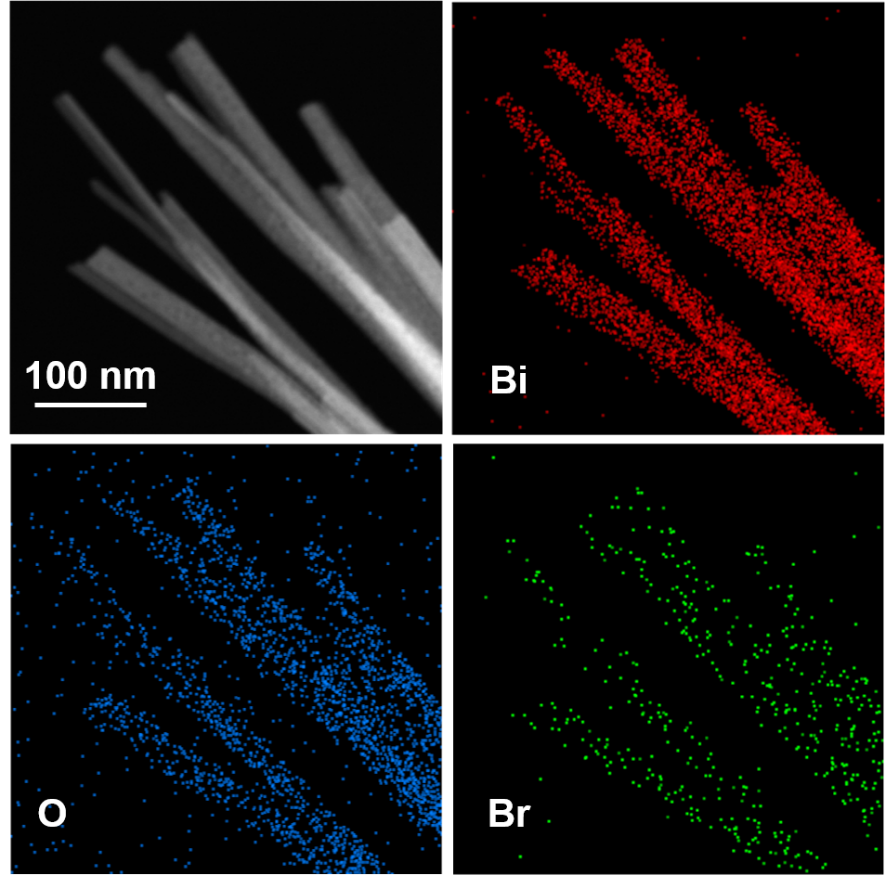


**Figure S8.** The EDS mapping of BOH-Br.


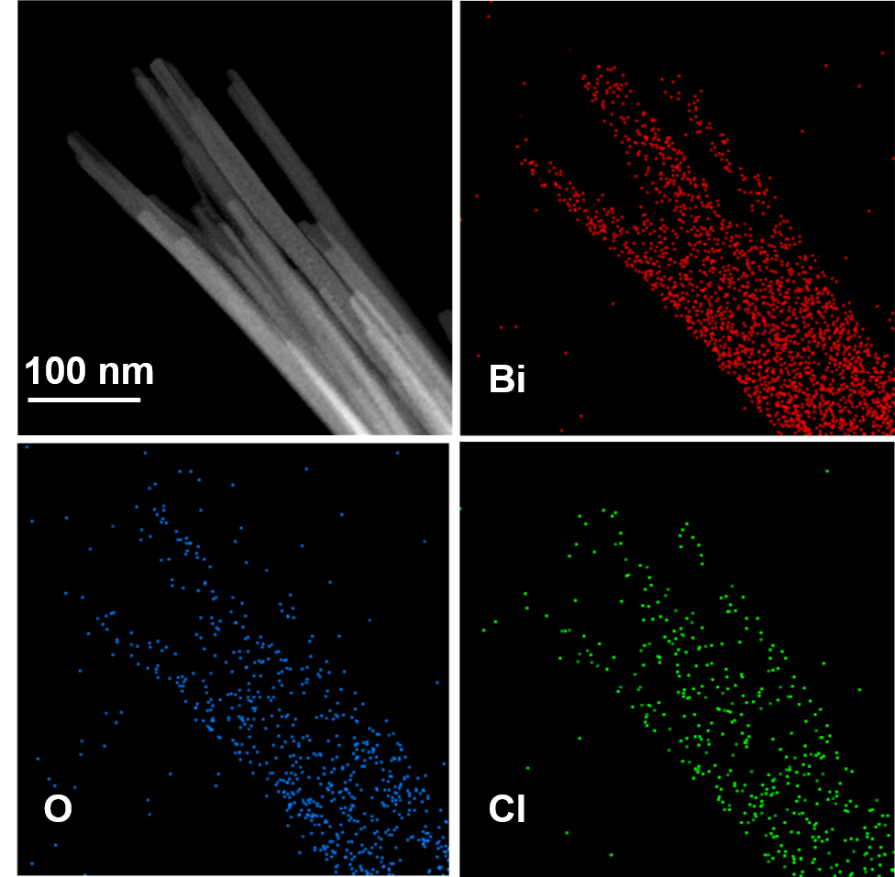


**Figure S9.** The EDS mapping of BOH-Cl.


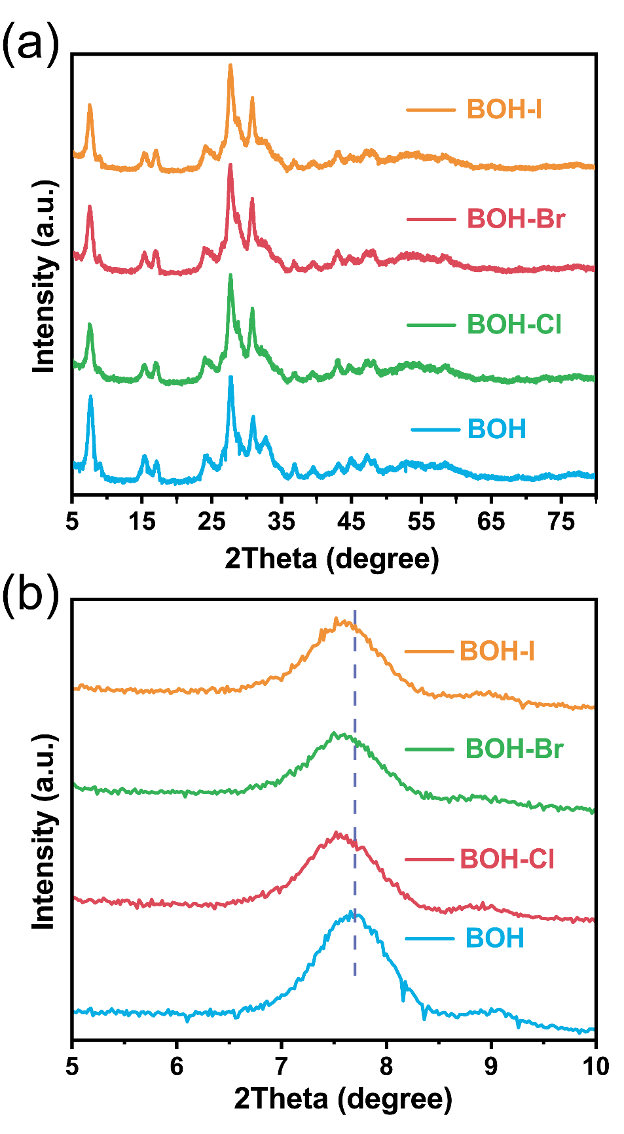


**Figure S10.** The XRD patterns of the BOH and BOH-X.


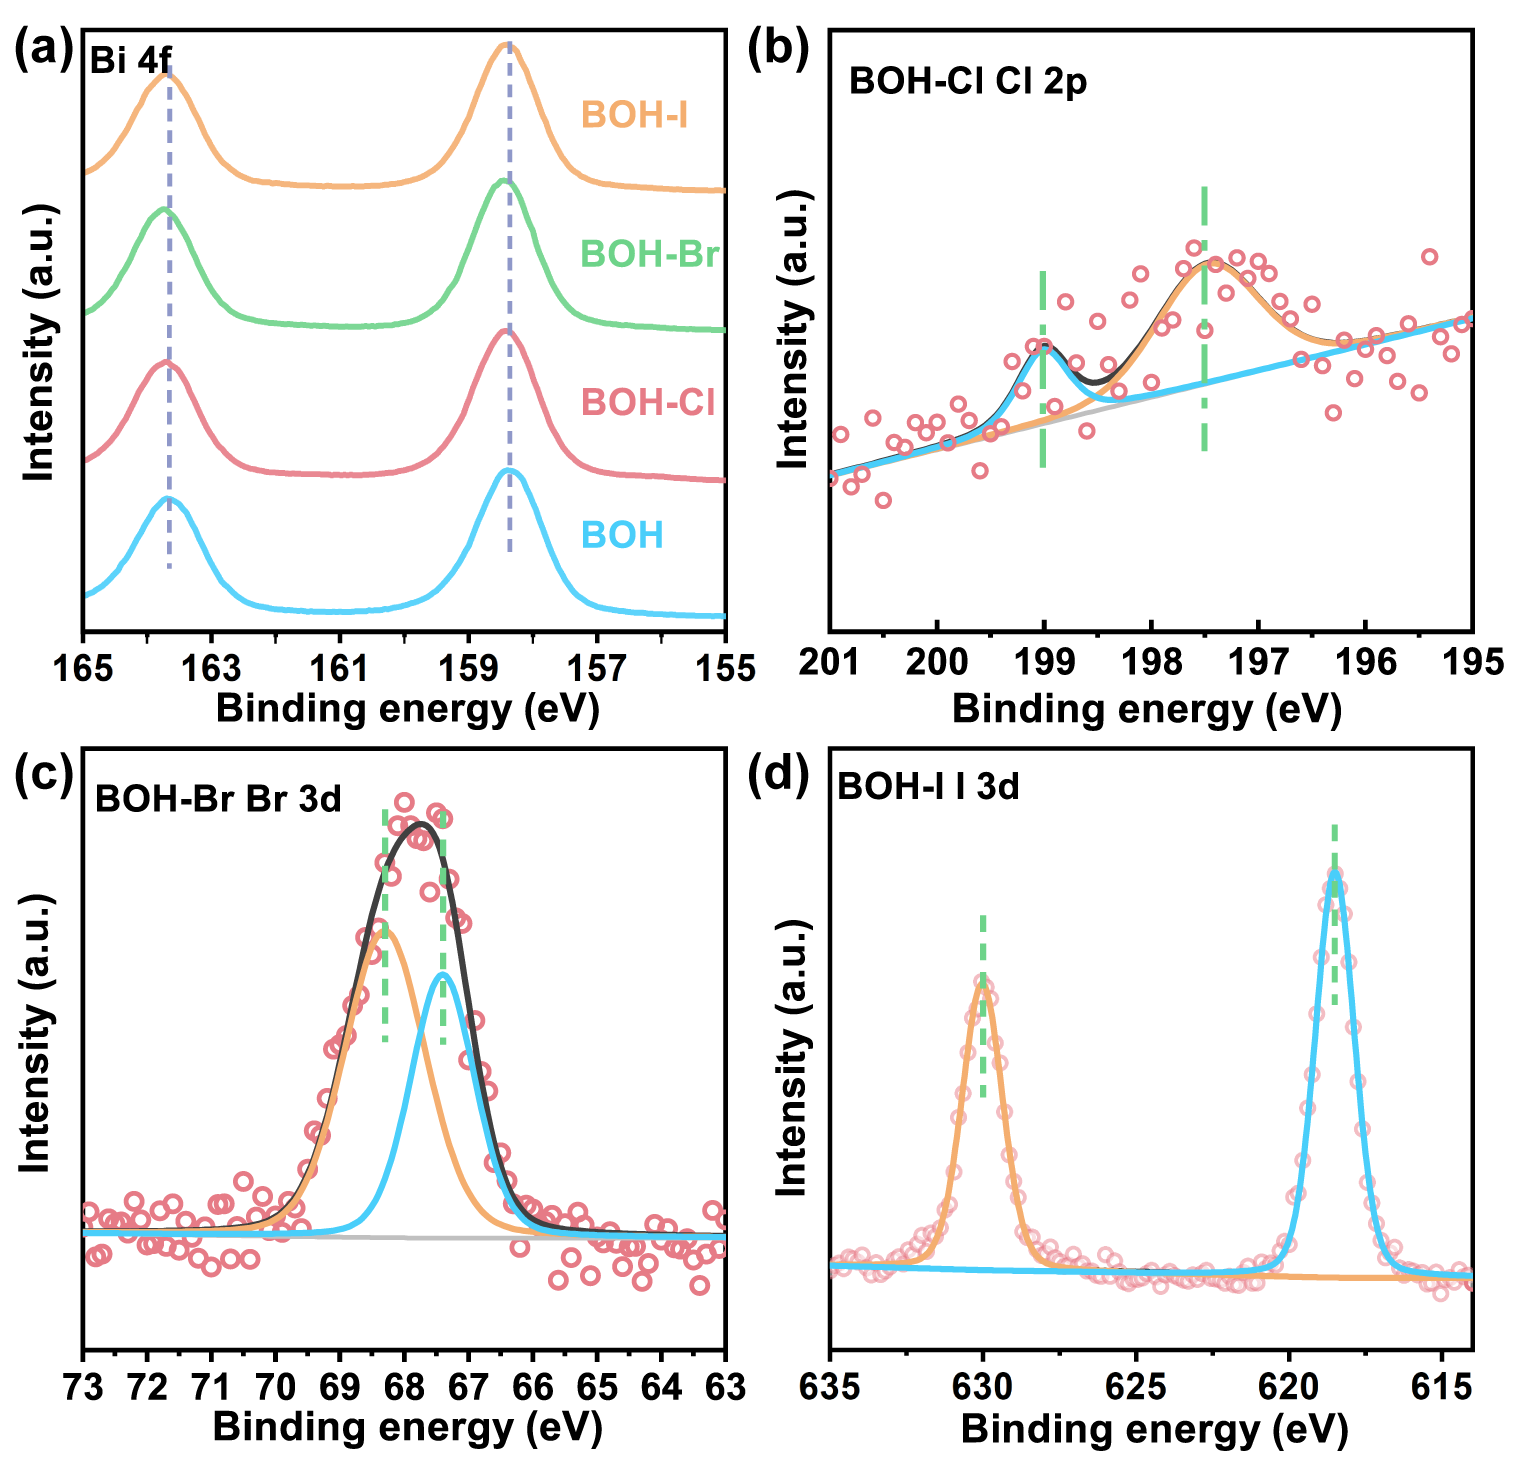


**Figure S11.** (a) XPS spectra of Bi in the samples before and after ion exchange; (b–d) XPS spectra of halogens in the BOH-I, BOH-Br and BOH-Cl, respectively.


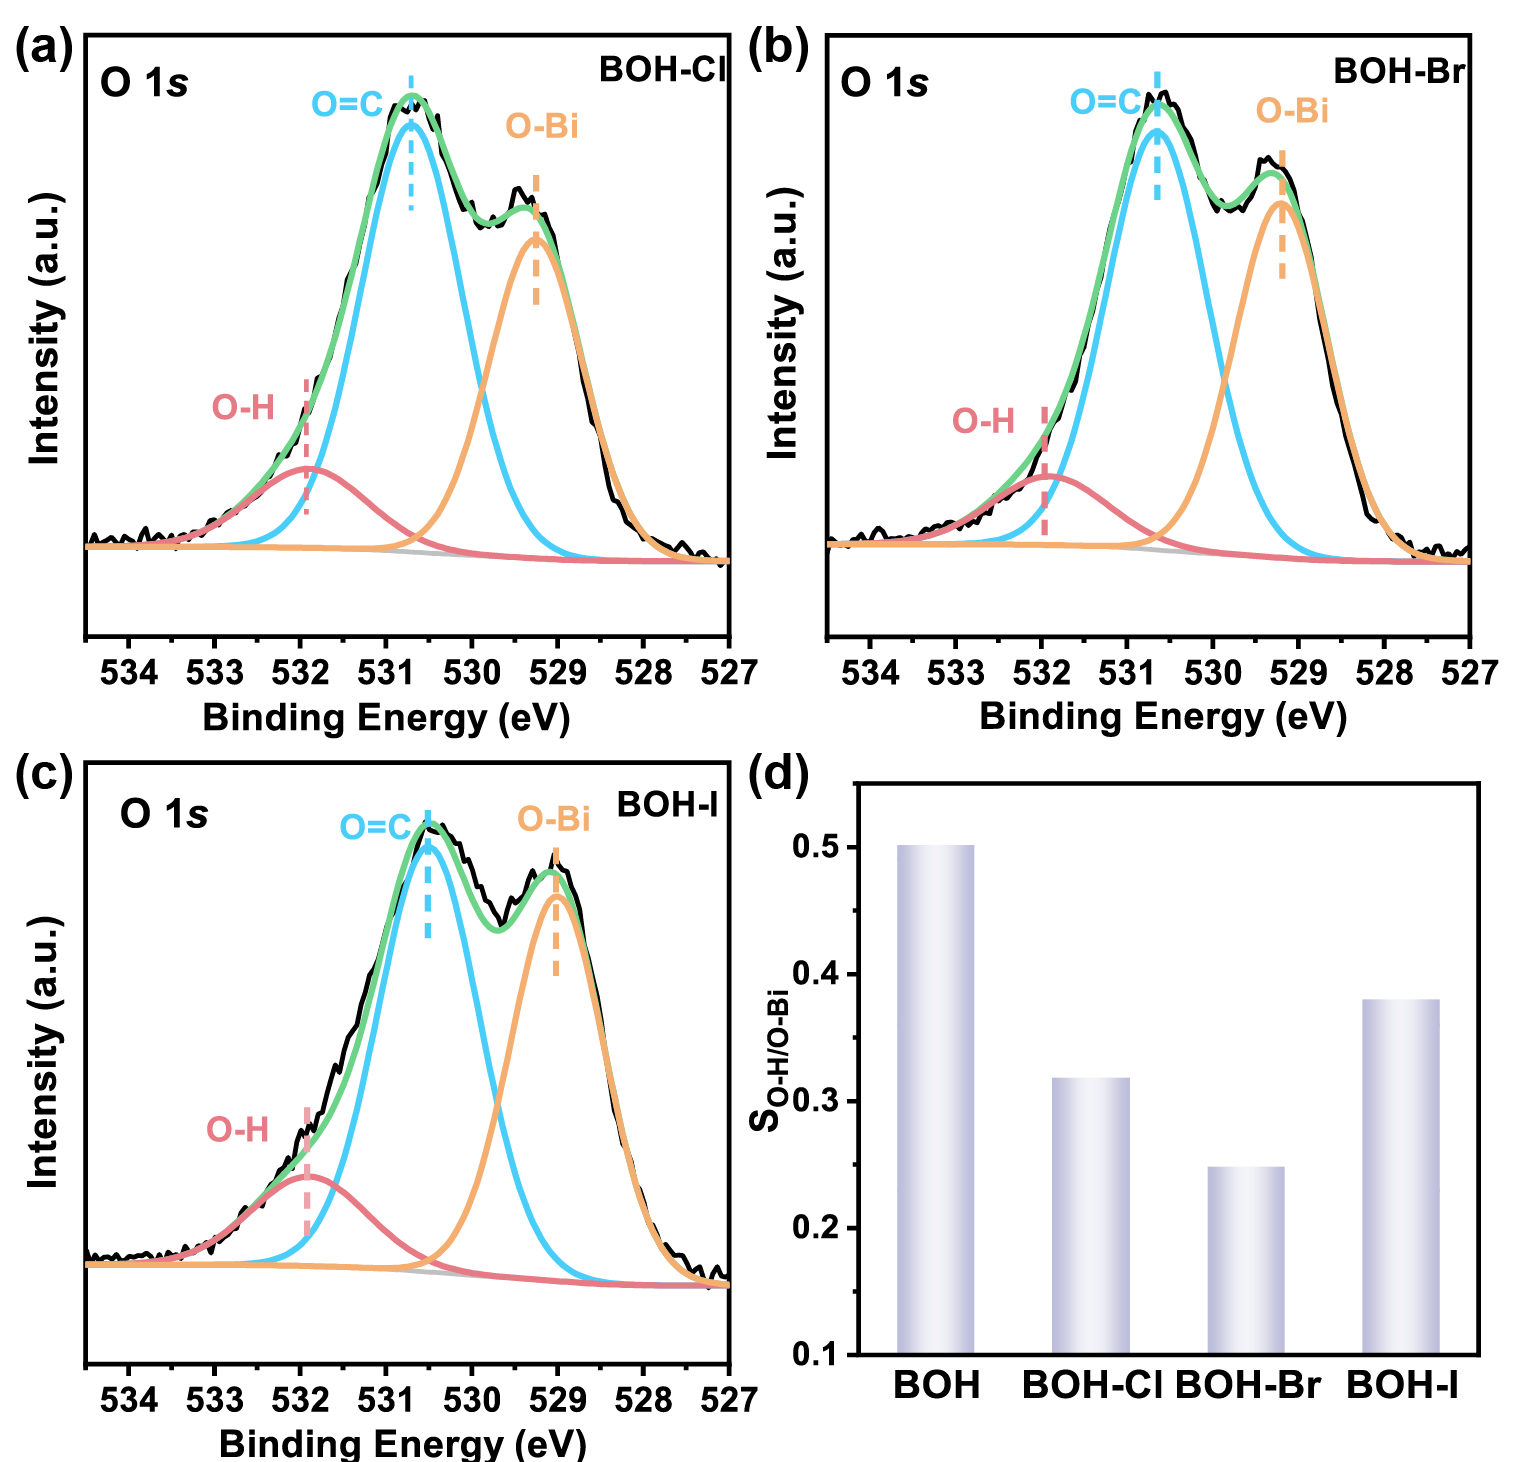


**Figure S12.** (a–c), XPS spectra of O in the ion-exchanged samples; (d) the ratios of O–H bond before and after ion exchange.


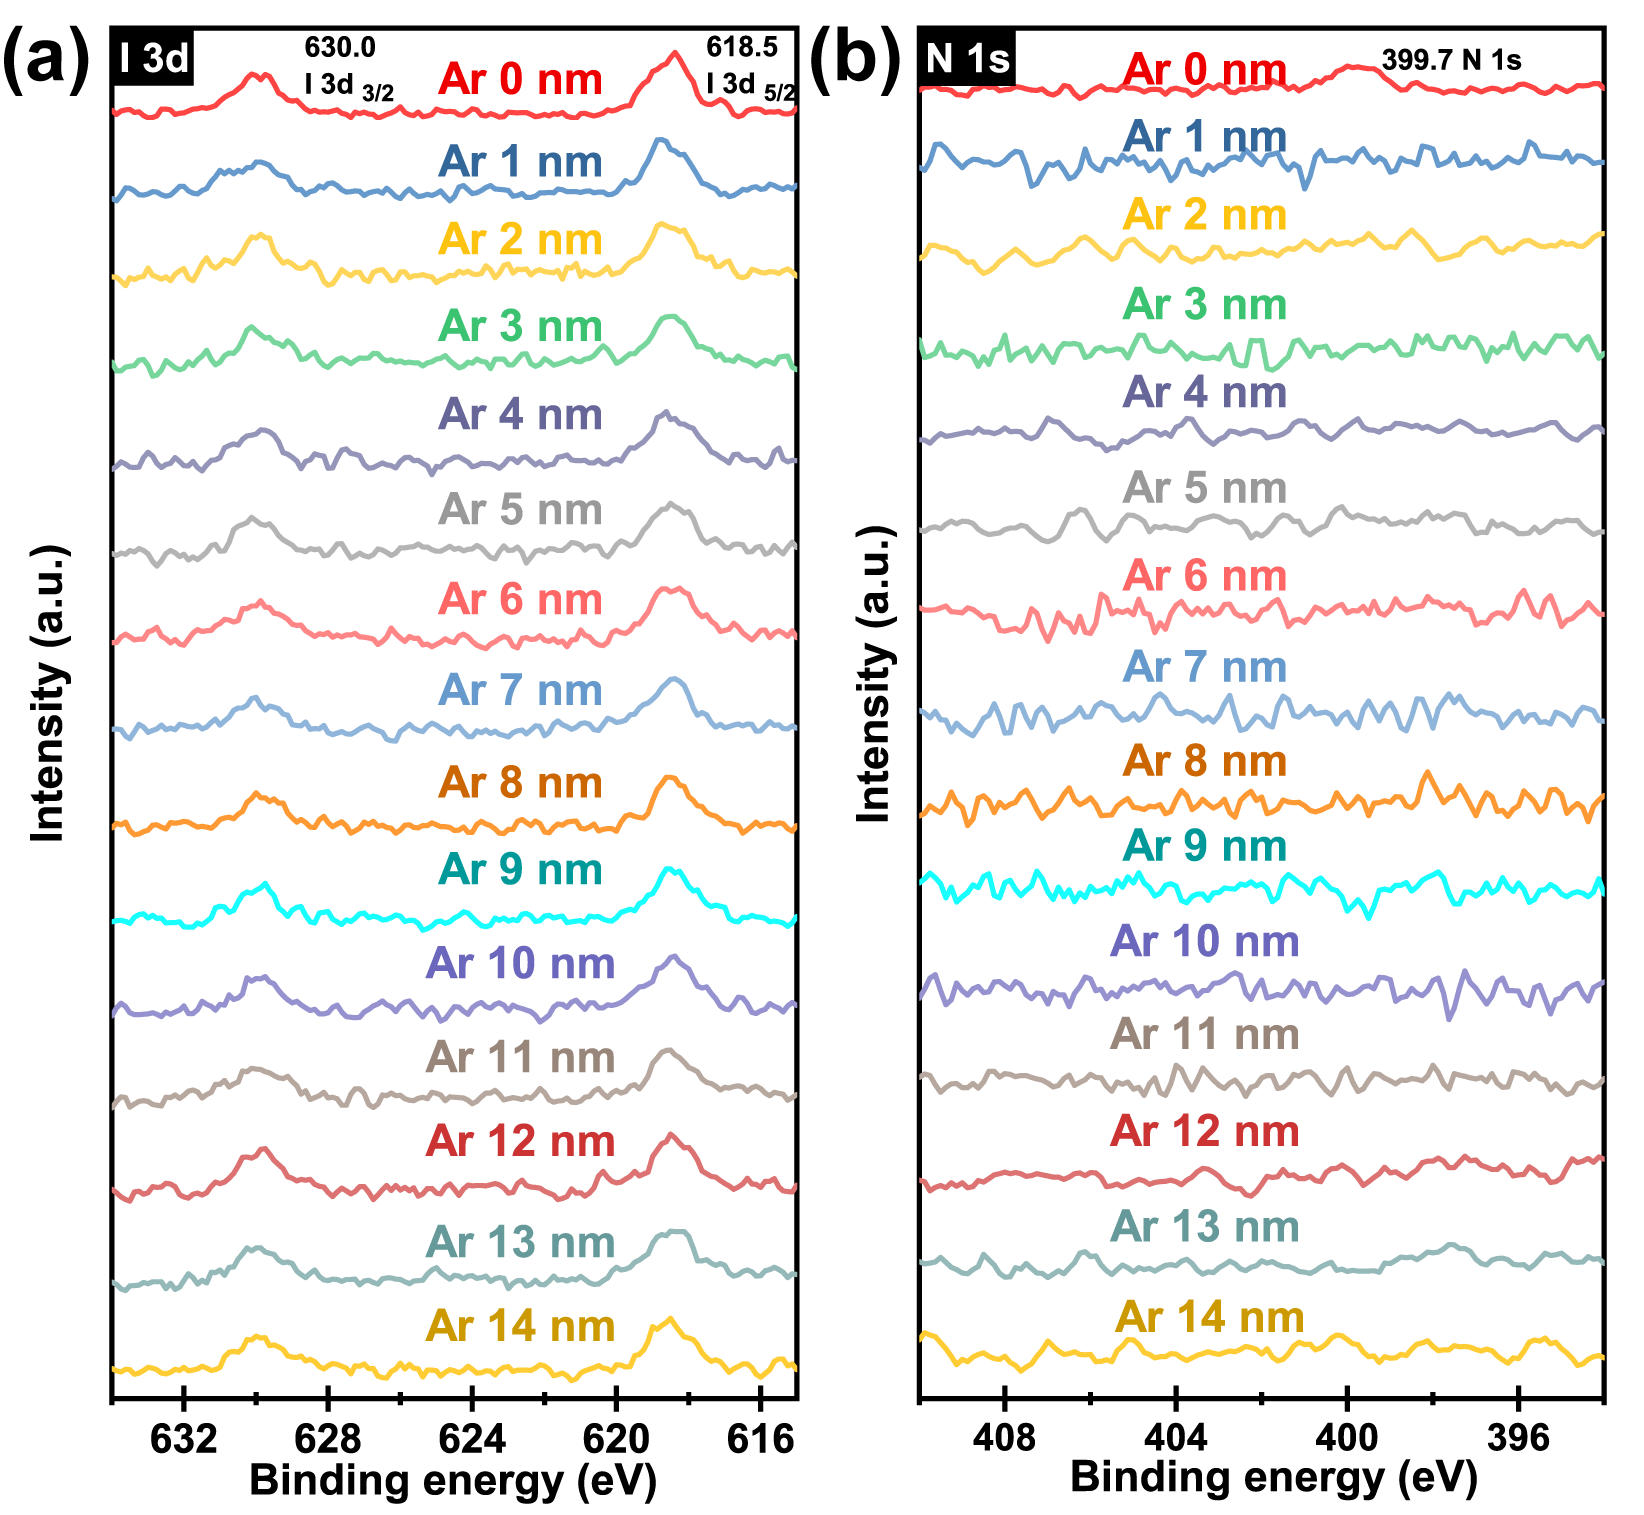


**Figure S13.** (a) High-resolution XPS spectra of I 3d (a) and N 1s (b) for BOH-I with Ar+ sputtering at different depths.


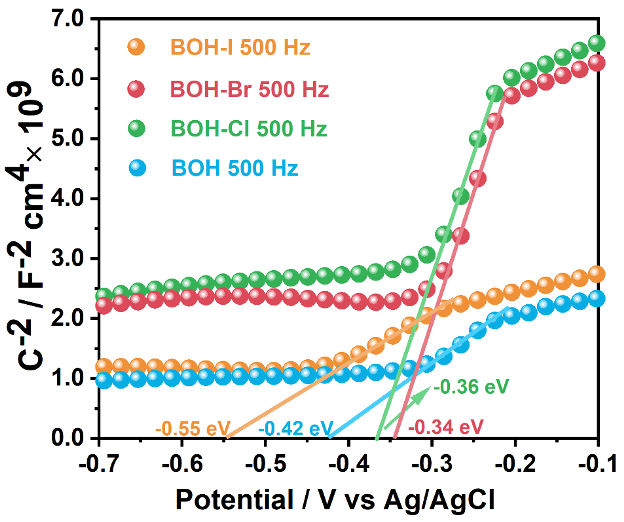


**Figure S14.** Mott–Schottky plots of the samples before and after ion exchange.


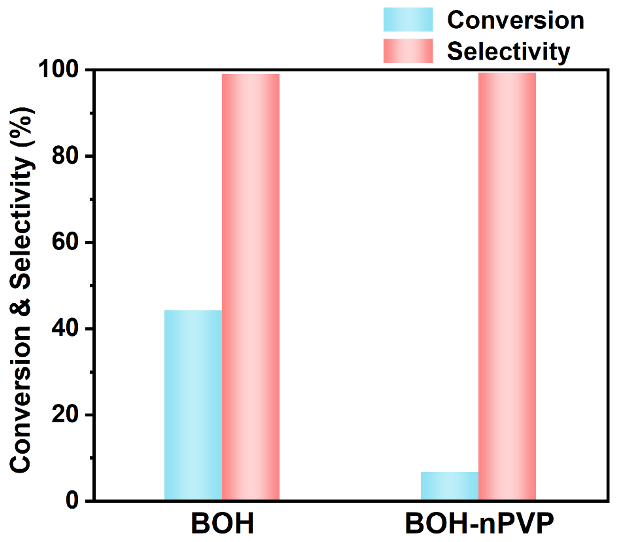


**Figure S15.** Catalytic performances of the normal BOH and BOH-nPVP.


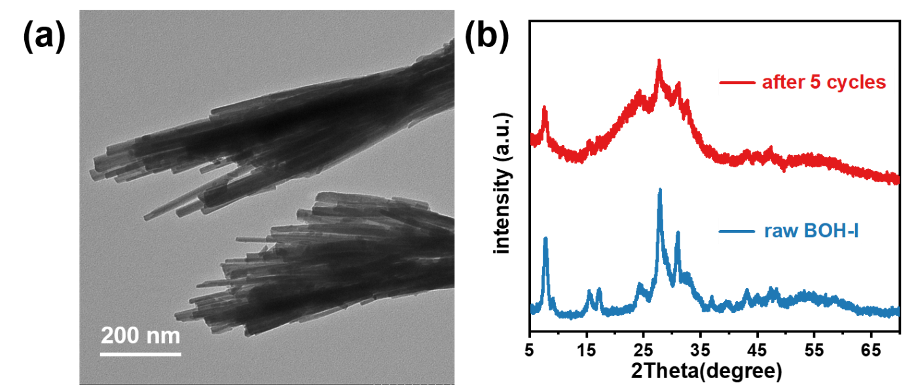


**Figure S16.** TEM image (a) and XRD patterns (b) of BOH-I after 5 catalytic cycles.


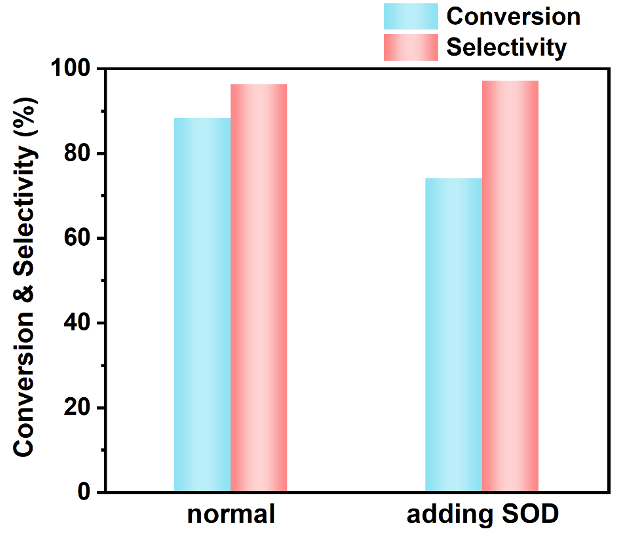


**Figure S17.** Catalytic performances of the normal BOH-I and after addition of superoxide dismutase (SOD).


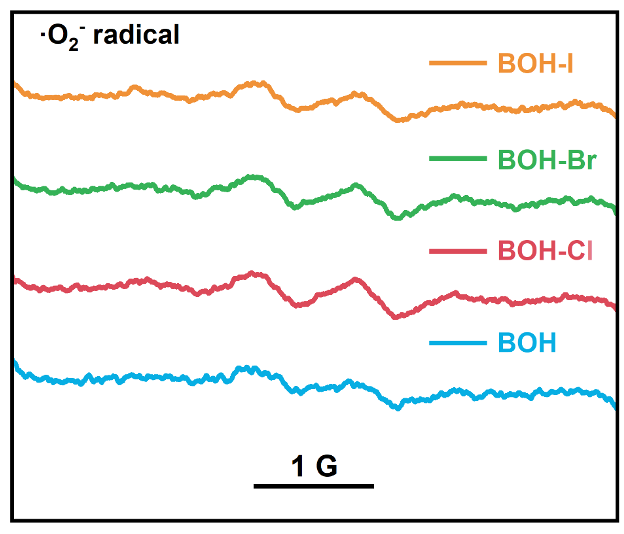


**Figure S18.** EPR spectra for the samples before and after ion exchange, with DMPO as scavenger.


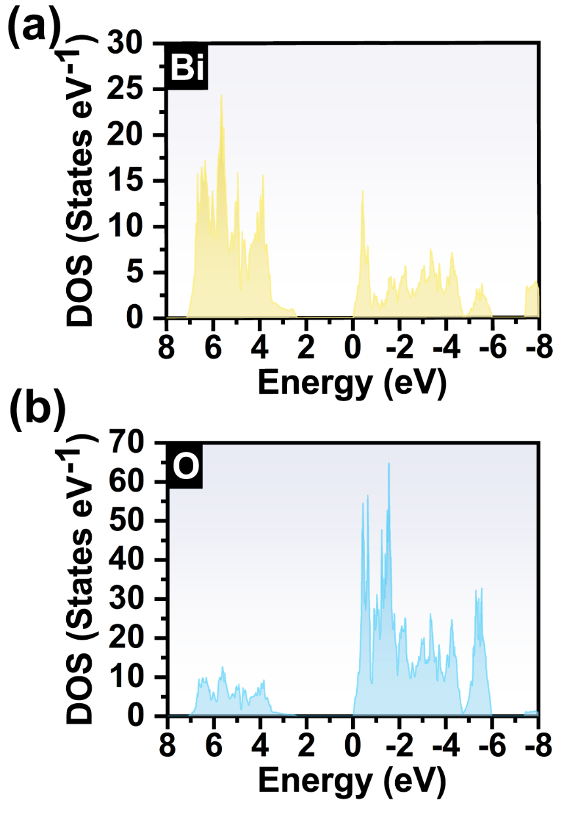


**Figure S19.** The calculated density of state of BOH: (a) and (b) show the contribution of bismuth and oxygen element to valence bands and conduction bands, respectively.


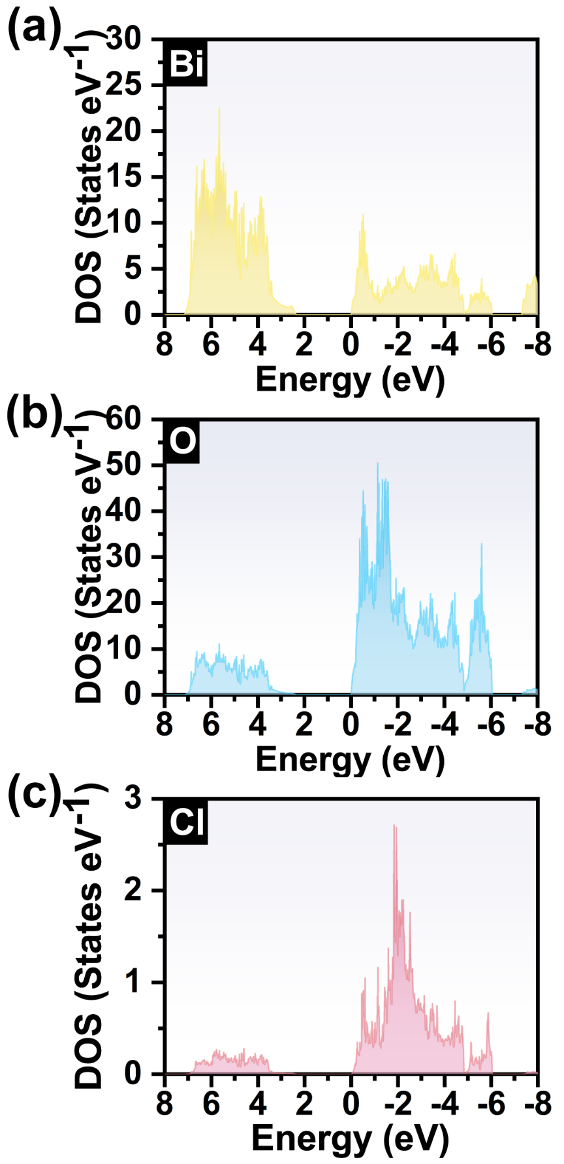

**Figure S20.** The calculated density of state of BOH-Cl: (a), (b) and (c) show the contribution of bismuth, oxygen and chlorine element to valence bands and conduction bands, respectively.


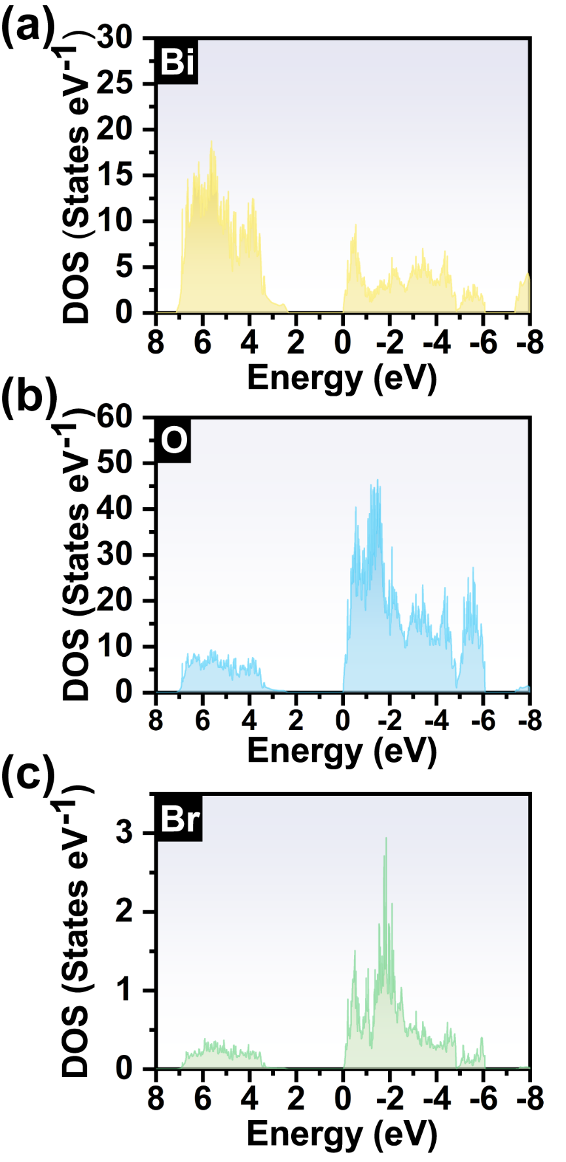
 **Figure S21.** The calculated density of state of BOH-Br: (a), (b) and (c) show the contribution of bismuth, oxygen and bromine element to valence bands and conduction bands, respectively.


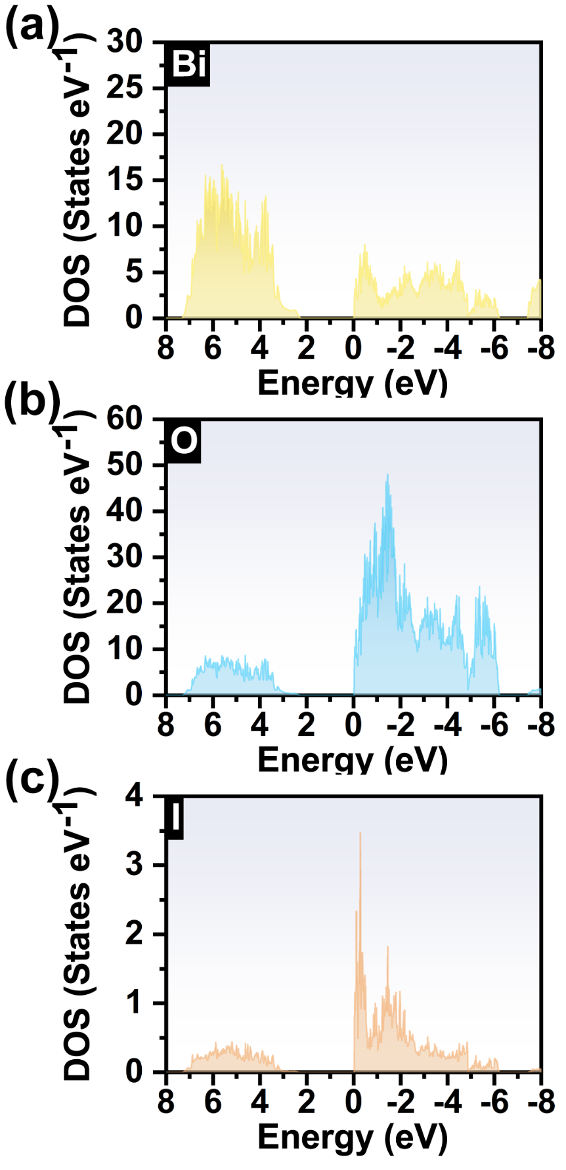


**Figure S22.** The calculated density of state of BOH-I: (a), (b) and (c) show the contribution of bismuth, oxygen and iodine element to valence bands and conduction bands, respectively.


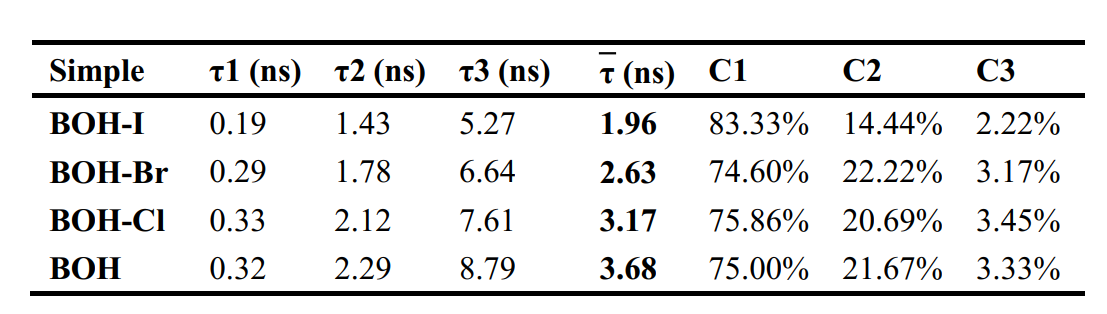
**Table S1.** The average PL lifetimes of BOH and BOH-X determined from the transient PL spectra.
